# Supplementary material
Source: PubMed Central journal article supplement (PMC3277833)
Supplement: 913857.f1.pdf [file 913857.f1.pdf]

**Supplementary table. Effect size of various parameters on mean birthweight**

|                                         | Difference in mean birthweight | Std. Error | P-value | (95% CI) |        |
|-----------------------------------------|--------------------------------|------------|---------|----------|--------|
|                                         |                                |            |         | Lower    | Upper  |
| <b>Active infection</b>                 | 180.1                          | 119.0      | 0.13    | -53.2    | 413.3  |
| <b>Past infection</b>                   | -328.0                         | 176.0      | 0.062   | -673.0   | 17.0   |
| <b>No infection</b>                     | 0 <sup>a</sup>                 |            |         |          |        |
| <b>Primigravidae</b>                    | -910.0                         | 358.3      | 0.011   | -1612.3  | -207.8 |
| <b>Multigravidae</b>                    | 0 <sup>a</sup>                 |            |         |          |        |
| <b>Age</b>                              | -2.0                           | 7.4        | 0.79    | -16.5    | 12.6   |
| <b>Primigravidae * Age</b>              | 37.6                           | 17.5       | 0.032   | 3.3      | 72.0   |
| <b>Multigravidae * Age</b>              | 0 <sup>a</sup>                 |            |         |          |        |
| <b>Primigravidae * Active infection</b> | -342.4                         | 155.6      | 0.028   | -647.4   | -37.5  |
| <b>Primigravidae * Past infection</b>   | 331.6                          | 271.5      | 0.222   | -200.6   | 863.8  |
| <b>Primigravidae * No infection</b>     | 0 <sup>a</sup>                 |            |         |          |        |
| <b>Multigravidae * Active infection</b> | 0 <sup>a</sup>                 |            |         |          |        |
| <b>Multigravidae * Past infection</b>   | 0 <sup>a</sup>                 |            |         |          |        |
| <b>Multigravidae * No infection</b>     | 0 <sup>a</sup>                 |            |         |          |        |

<sup>a</sup> Reference categories.

Birthweight estimates are based on the following model: (Intercept), gravidity, placental malaria, age, gravidity \* age, gravidity \* placental malaria.
